# Supplementary material for: The Innate Immune Cell Profile of the Cornea Predicts the Onset of Ocular Surface Inflammatory Disorders
Source: PubMed Central journal article supplement (PMC6947418; doi:10.3390/jcm8122110), 2019-12-02
Supplement: jcm-08-02110-s001.pdf [file jcm-08-02110-s001.pdf]

# Supplementary Material

| DISEASE                 | KEYWORDS TO INCLUDE                                                                                                                                                                                                                                                         | KEYWORDS TO EXCLUDE                                                                  |
|-------------------------|-----------------------------------------------------------------------------------------------------------------------------------------------------------------------------------------------------------------------------------------------------------------------------|--------------------------------------------------------------------------------------|
| Contact Lens Wearer     | Contact Lens, Cells, Contact Lens Wear, Patient, randomly                                                                                                                                                                                                                   | Review, <i>in vitro</i> , animal, treatment                                          |
| Corneal Graft Rejection | Cells, T cells, CD4, corneal graft, macrophages, CD8, corneal graft rejection, lymphocytes, dendritic cells, patient, controls, neutrophils, ocular surface, conjunctival, Treg cells, Th1 cells, Th17 cells, healthy controls, memory, Th2 cells, lacrimal                 | Review, <i>in vitro</i> , animal, treatment                                          |
| Dry Eye                 | T cells, dry, dry eye, CD4+ T cells, Plasma cells, dendritic cells, T lymphocytes, Th1, macrophages, B lymphocytes, Neutrophils, DED, Th17 cells, CD8+ T cells, Th1 cells, Treg cells, Th2 cells, memory T cells, natural killer T cells, Innate lymphoid cells, gd T cells | Review, syndrome, Sjögren, SS, animal, treatment                                     |
| Glaucoma                | Glaucoma, cells, patients, macrophages, ocular, plasma, conjunctival, lymphocytes, surface, T cells, Neutrophils, dendritic cells, CD4, CD8, Treg cells, Th2 cells, Th1 cells, lacrimal, autoimmune, Th17 cells, memory                                                     | Review, blood, animals, treatment                                                    |
| GvHD                    | Graft-versus-Host, cells, patients, T cells, eye, CD4, CD8, Lymphocytes, lacrimal, dendritic cells, ocular surface macrophages, plasma cells, neutrophils, Th17 cells, Treg cells, Th1 cells, Th2 cells                                                                     | Review, treatment, skin, bone, animal, blood, cancer                                 |
| Scleritis               | Scleritis, cells, lymphocytes, dendritic, neutrophils                                                                                                                                                                                                                       | Review, blood, animal, treatment                                                     |
| Keratitis               | keratitis, cells, neutrophils, CD8, lymphocytes, ocular surface, dendritic cells, Th1 cells, memory, Th17 cells, lacrimal, Treg cells, Th2                                                                                                                                  | Review, blood, animal, treatment                                                     |
| Sjögren's syndrome      | Syndrome, Sjögren's syndrome, cell, patient, SS, T cells, Lymphocytes, CD4, controls, plasma, lacrimal, plasma cells, CD+, surface, dendritic, Th17, macrophages, Th1, eye, memory, Th2, ocular, neutrophils, Treg, conjunctiva                                             | Review, salivary, blood, treatment, labial, peripheral blood mononuclear, mouth, lip |

**Table 1S.** Keywords used to filter the records identified through database searching in order to obtain the final studies to perform the meta-analysis.

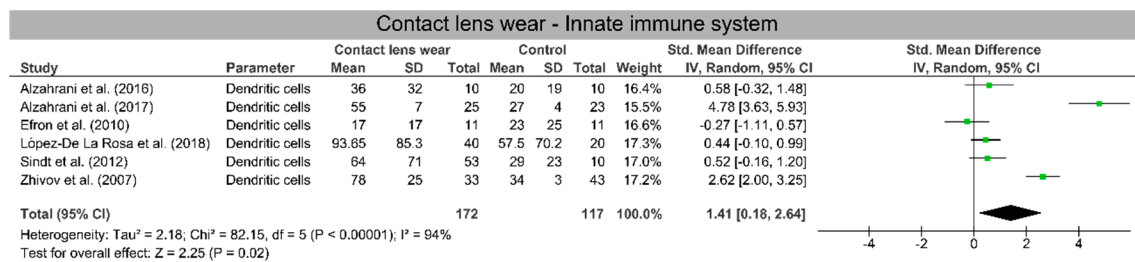

**Figure 1S.** Meta-Analysis results for contact lens wearers. Only innate immune system is shown, because no adaptive immune cells were found.

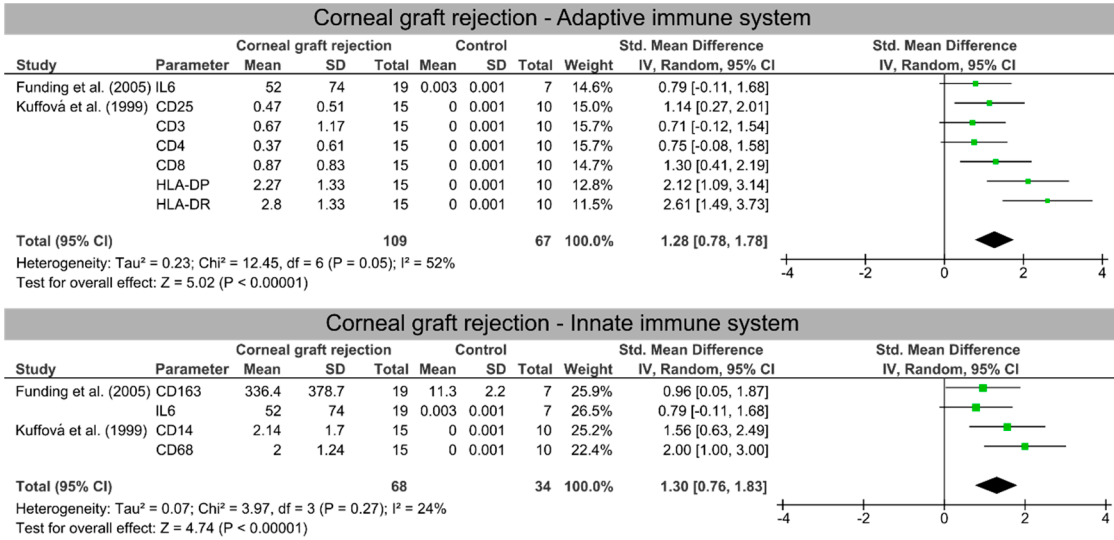

**Figure 2S.** Meta-Analysis results for corneal graft rejection

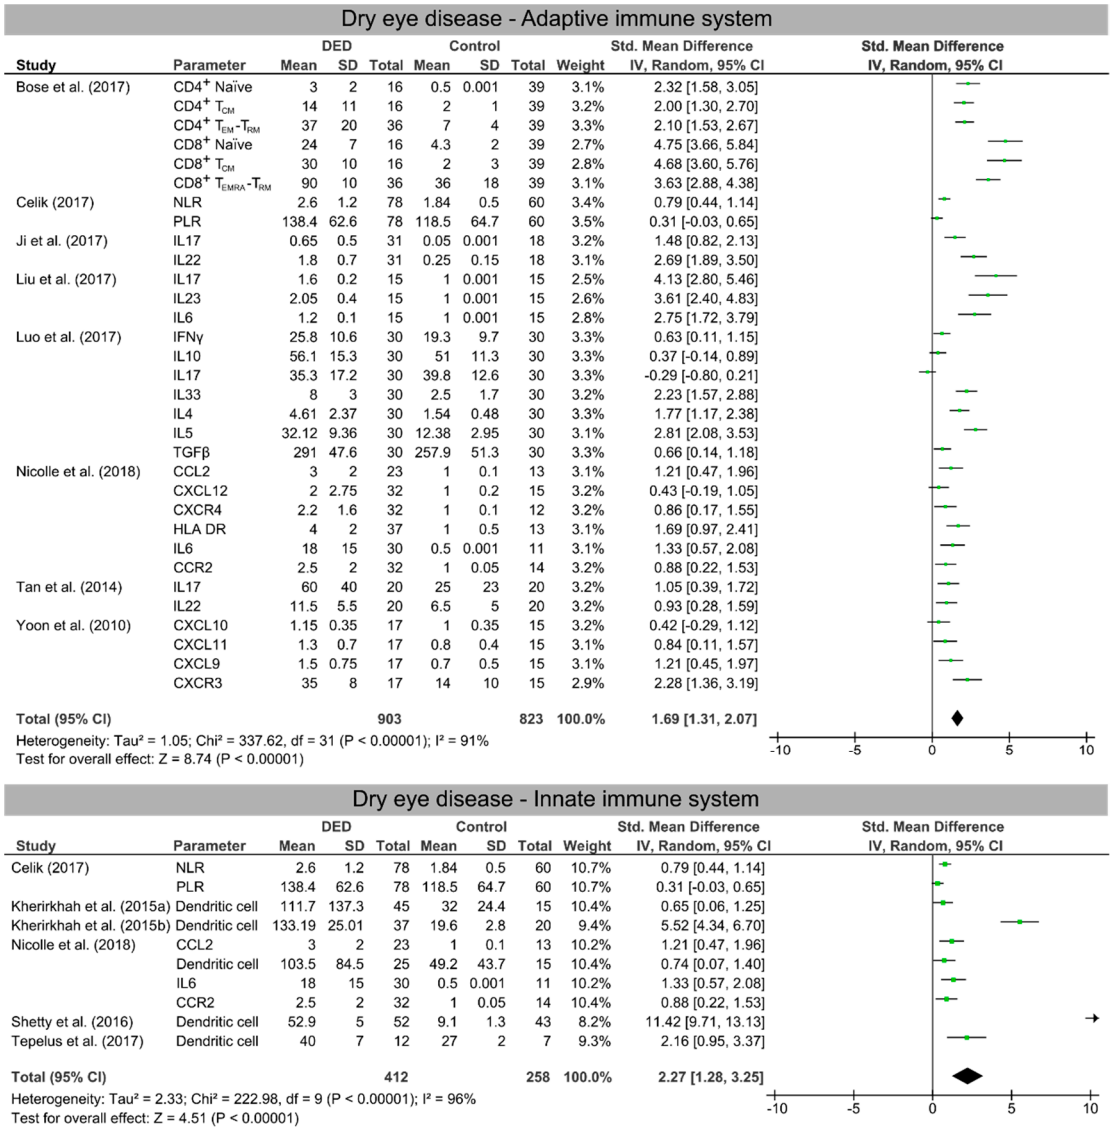

**Figure 3S.** Meta-analysis for Dry Eye Disease

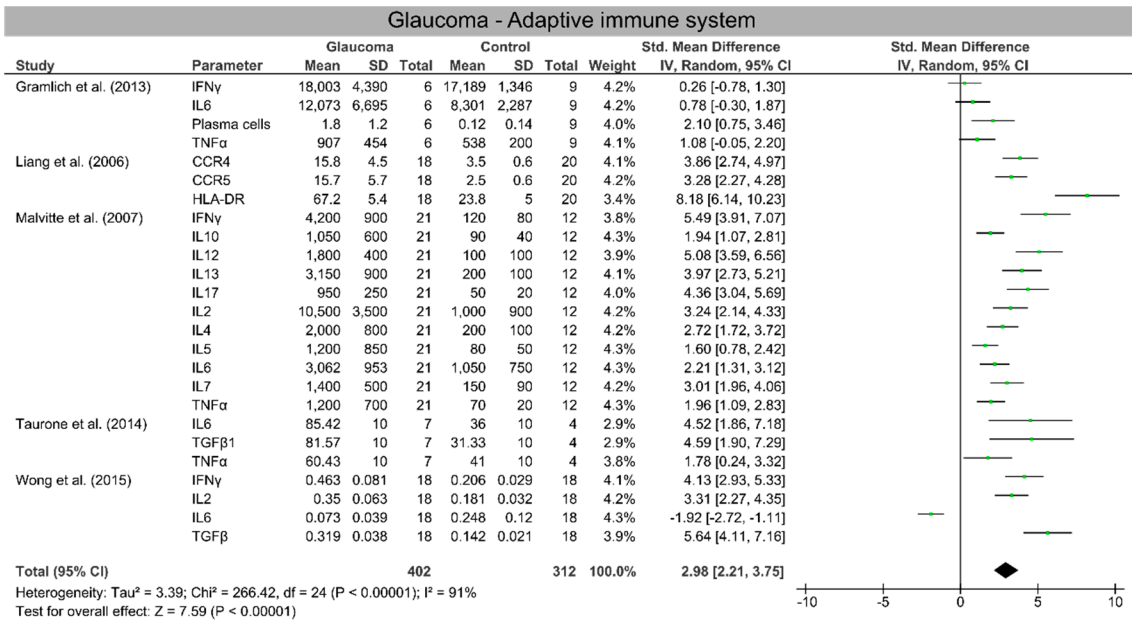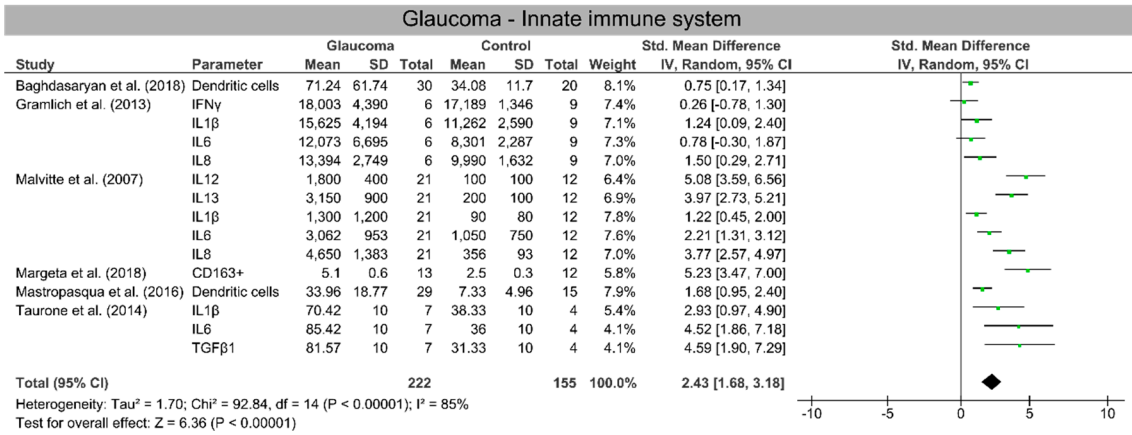

**Figure 4S.** Meta-analysis for Glaucoma

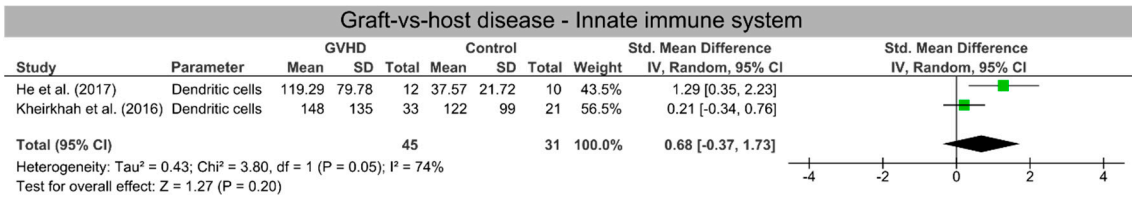

**Figure 5S.** Meta-analysis for Graft vs Host Disease. Only innate immune system is shown, because no adaptive immune cells were found.

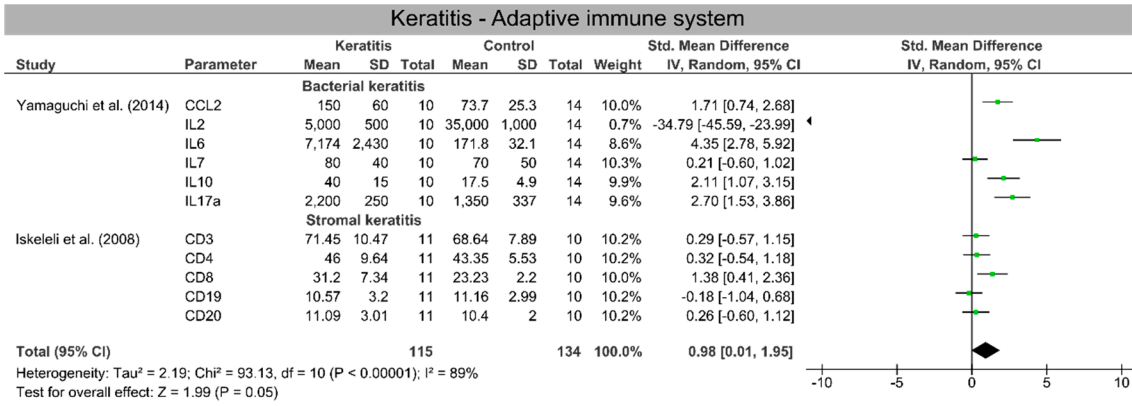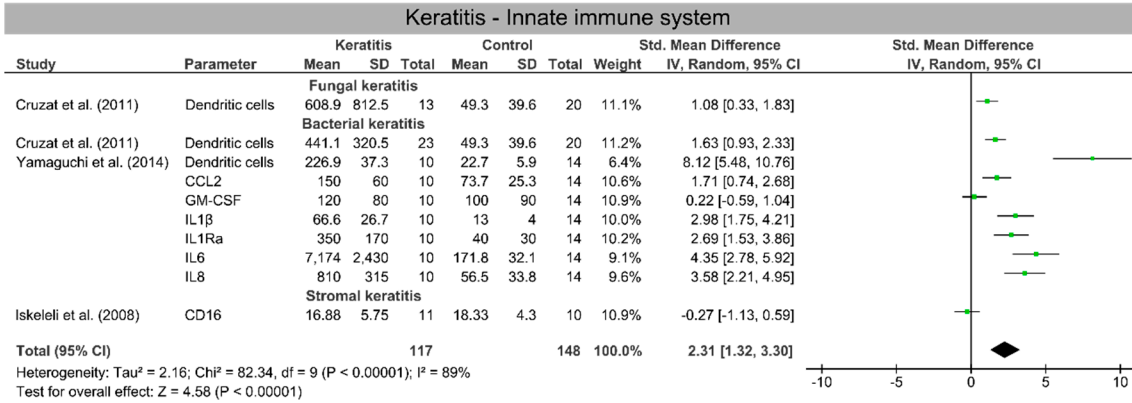

**Figure 6S.** Meta-analysis for Keratitis

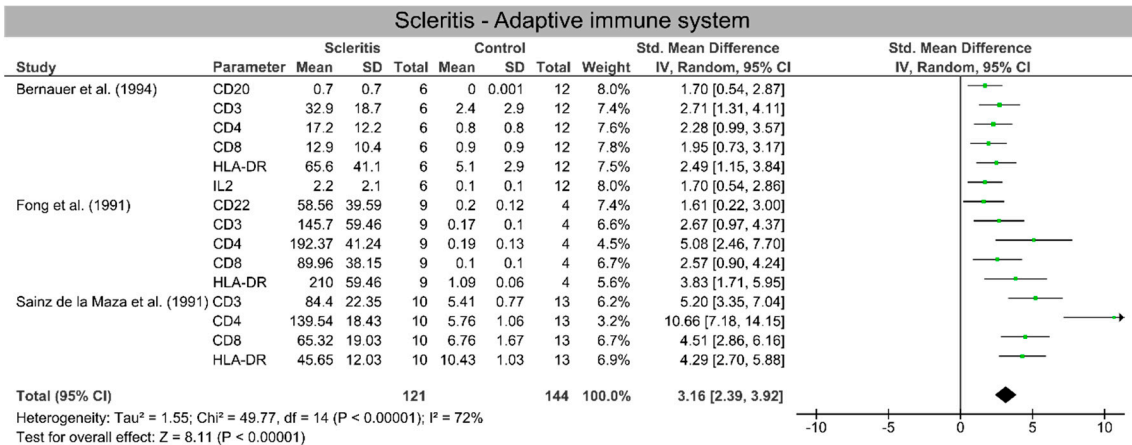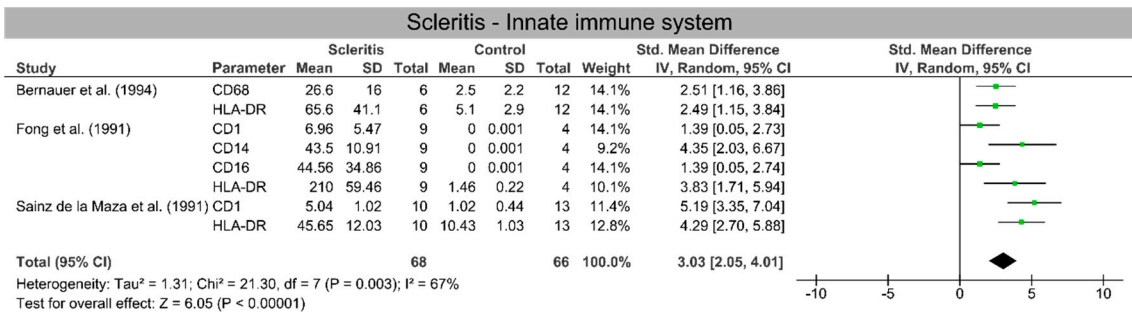

**Figure 7S.** Meta-analysis for Scleritis

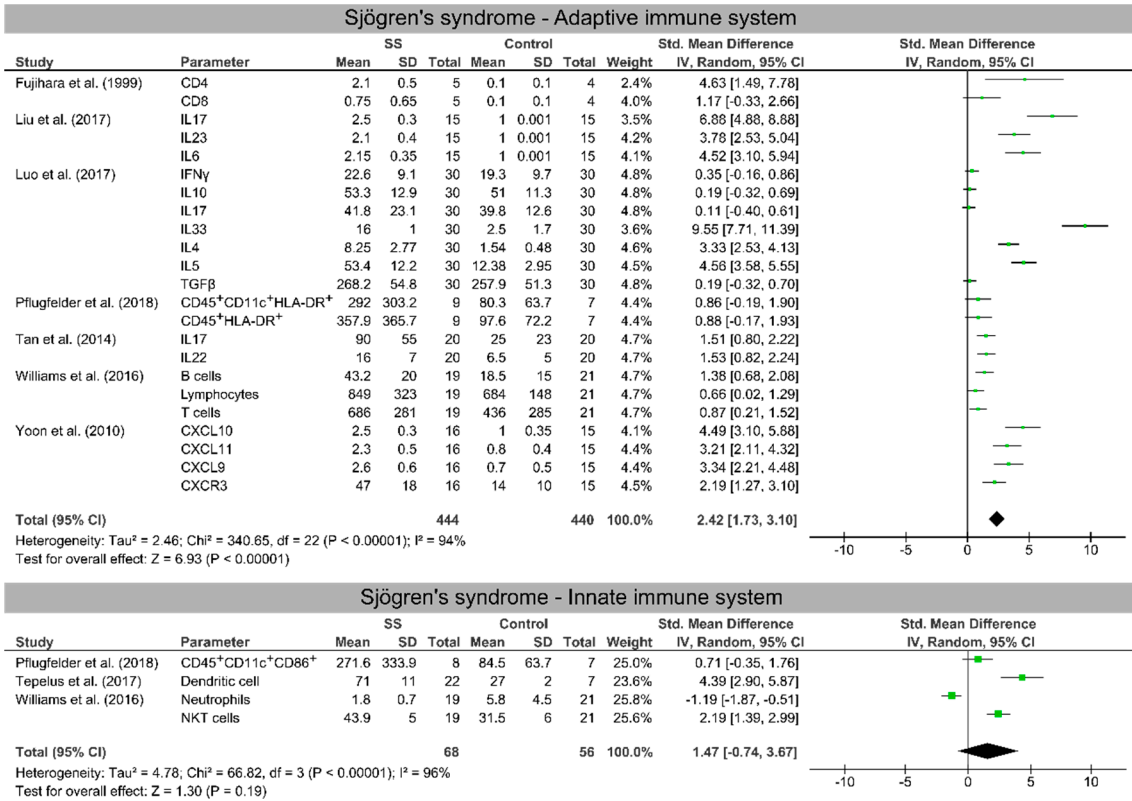

**Figure 8S.** Meta-analysis for Sjögren's Syndrome
